# Supplementary material
Source: PubMed Central journal article supplement (PMC3620963)
Supplement: NIHMS423008-supplement-Supp_Table_S1-S4.pdf [file NIHMS423008-supplement-Supp_Table_S1-S4.pdf]

**Supplemental Table 1.** Pearson correlation coefficients showing simple associations among study variables measured in the AD sample (n = 280)

| Variable                          | Emo. Abuse | Phys. Abuse | Sex. Abuse | Emo. Neglect | Phys. Neglect | CTQ Total Score | Age First Drink | Age First Intox. | With. Depress. | With. Anxiety | N        | E     | O       | A     | C        | AD Severity |
|-----------------------------------|------------|-------------|------------|--------------|---------------|-----------------|-----------------|------------------|----------------|---------------|----------|-------|---------|-------|----------|-------------|
| Emotional Abuse                   | --         |             |            |              |               |                 |                 |                  |                |               |          |       |         |       |          |             |
| Physical Abuse                    | 0.56***    | --          |            |              |               |                 |                 |                  |                |               |          |       |         |       |          |             |
| Sexual Abuse                      | 0.33***    | 0.22***     | --         |              |               |                 |                 |                  |                |               |          |       |         |       |          |             |
| Emotional Neglect                 | 0.68***    | 0.50***     | 0.21***    | --           |               |                 |                 |                  |                |               |          |       |         |       |          |             |
| Physical Neglect                  | 0.53***    | 0.48***     | 0.16**     | 0.64***      | --            |                 |                 |                  |                |               |          |       |         |       |          |             |
| CTQ Total Score                   | 0.85***    | 0.70***     | 0.50***    | 0.84***      | 0.70***       | --              |                 |                  |                |               |          |       |         |       |          |             |
| Age at First Drink                | -0.10      | -0.05       | -0.01      | -0.06        | -0.04         | -0.09           | --              |                  |                |               |          |       |         |       |          |             |
| Age at First Alcohol Intoxication | -.12*      | -0.05       | -0.04      | -0.04        | -0.003        | -0.08           | 0.52***         | --               |                |               |          |       |         |       |          |             |
| Withdrawal Depression             | 0.28***    | 0.02        | 0.18**     | 0.23***      | 0.13*         | 0.25***         | 0.06            | 0.03             | --             |               |          |       |         |       |          |             |
| Withdrawal Anxiety                | 0.29***    | 0.11        | 0.23***    | 0.21***      | 0.18**        | 0.28***         | 0.05            | 0.02             | 0.79***        | --            |          |       |         |       |          |             |
| Neuroticism                       | 0.43***    | 0.25***     | 0.22***    | 0.35***      | 0.30***       | 0.43***         | -0.20***        | -0.19**          | 0.27***        | 0.27***       | --       |       |         |       |          |             |
| Extraversion                      | -0.19**    | -0.12*      | 0.001      | -0.22***     | -0.18**       | -0.22***        | 0.02            | 0.04             | -0.12*         | -0.12*        | -0.18**  | --    |         |       |          |             |
| Openness                          | 0.05       | -0.02       | 0.06       | -0.07        | -0.02         | -0.01           | 0.14*           | 0.001            | -0.01          | -0.001        | -0.09    | 0.08  | --      |       |          |             |
| Agreeableness                     | -0.15*     | -0.11       | -0.05      | -0.17**      | -0.19***      | -0.19**         | 0.19**          | 0.22***          | -0.02          | -0.08         | -0.11    | 0.10  | 0.26*** | --    |          |             |
| Conscientiousness                 | -0.19***   | -0.002      | -0.08      | -0.18**      | -0.09         | -0.13*          | 0.04            | 0.15**           | -0.17**        | -0.10         | -0.29*** | -0.04 | 0.09    | 0.05  | --       |             |
| Alcohol Dependence Severity       | 0.34***    | 0.19**      | 0.13*      | 0.18**       | 0.09          | 0.24***         | -0.01           | -0.22***         | 0.20***        | 0.26***       | 0.32***  | 0.02  | 0.002   | -0.10 | -0.26*** | --          |

**Supplemental Table 1.** Continued

Notes: Emo. = Emotional, Phys. = Physical, Sex. = Sexual, Intox. = Intoxication, With. = withdrawal, N = Neuroticism, E = Extraversion, O = Openness, A = Agreeableness, C = Conscientiousness, AD = Alcohol Dependence

\* $p < 0.05$

\*\*  $p < 0.01$

\*\*\*  $p < 0.001$

<sup>1</sup>Pearson correlation coefficients

**Supplemental Table 2.** Results of multiple mediation analyses for CTQ total score and for emotional abuse using subfacets of neuroticism for AD subjects<sup>1</sup>

| Independent Variable (IV) | Mediator                 | Effect of IV on Mediator <sup>1</sup> | Effect of Mediator on AD Severity | Indirect Effect Estimate <sup>2</sup> | 95% Bias-Corrected Confidence Interval | Total Effect of IV | Direct Effect of IV |
|---------------------------|--------------------------|---------------------------------------|-----------------------------------|---------------------------------------|----------------------------------------|--------------------|---------------------|
| CTQ Total Score           | Anxiety Subfacet         | 0.16**                                | 0.08                              | 0.01                                  | -0.01, 0.04                            | 0.09**             | 0.05                |
|                           | Anger/Hostility Subfacet | 0.15**                                | -0.08                             | -0.01                                 | -0.03, 0.00                            |                    |                     |
|                           | Depressive Subfacet      | 0.19***                               | 0.11                              | 0.02                                  | -0.002, 0.05                           |                    |                     |
|                           | Self-Conscious Subfacet  | 0.19***                               | 0.04                              | 0.01                                  | -0.01, 0.04                            |                    |                     |
|                           | Impulsive Subfacet       | 0.06                                  | 0.15**                            | 0.01                                  | -0.004, 0.03                           |                    |                     |
|                           | Vulnerable Subfacet      | 0.18**                                | -0.02                             | -0.003                                | -0.03, 0.02                            |                    |                     |
| Emotional Abuse           | Anxiety Subfacet         | 0.33                                  | 0.10                              | 0.04                                  | -0.004, 0.13                           | 0.47***            | 0.36**              |
|                           | Anger/Hostility Subfacet | 0.34                                  | -0.09*                            | -0.03                                 | -0.10, 0.00                            |                    |                     |
|                           | Depressive Subfacet      | 0.38*                                 | 0.11                              | 0.04                                  | -0.003, 0.15                           |                    |                     |
|                           | Self-Conscious Subfacet  | 0.37                                  | 0.04                              | 0.01                                  | -0.02, 0.08                            |                    |                     |
|                           | Impulsive Subfacet       | 0.51**                                | 0.14**                            | 0.07                                  | 0.01, 0.17 <sup>†</sup>                |                    |                     |
|                           | Vulnerable Subfacet      | 0.45                                  | -0.02                             | -0.003                                | -0.09, 0.03                            |                    |                     |

<sup>1</sup> Effect estimates are unstandardized regression coefficients<sup>2</sup> Based on 5000 bootstrapped samples

\* p &lt; 0.05

\*\* p &lt; 0.01

\*\*\* p &lt; 0.001

<sup>†</sup> Significant indirect effect

**Supplemental Table 3.** Pearson correlation coefficients showing simple associations between study variables in the CON sample (n = 137)

| Variable             | Emo. Abuse | Phys. Abuse | Sex. Abuse | Emo. Neglect | Phys. Neglect | CTQ Total Score | Age First Drink | Heavy Drink. Years | N        | E     | O        | A        | C     | AUDIT Score |
|----------------------|------------|-------------|------------|--------------|---------------|-----------------|-----------------|--------------------|----------|-------|----------|----------|-------|-------------|
| Emotional Abuse      | --         |             |            |              |               |                 |                 |                    |          |       |          |          |       |             |
| Physical Abuse       | 0.27**     | --          |            |              |               |                 |                 |                    |          |       |          |          |       |             |
| Sexual Abuse         | 0.13       | 0.14        | --         |              |               |                 |                 |                    |          |       |          |          |       |             |
| Emotional Neglect    | 0.49***    | 0.21*       | 0.04       | --           |               |                 |                 |                    |          |       |          |          |       |             |
| Physical Neglect     | 0.14       | 0.14        | 0.04       | 0.44***      | --            |                 |                 |                    |          |       |          |          |       |             |
| CTQ Total Score      | 0.63***    | 0.54***     | 0.16       | 0.85***      | 0.52***       | --              |                 |                    |          |       |          |          |       |             |
| Age at First Drink   | -0.03      | 0.18*       | -0.10      | 0.02         | -0.03         | 0.03            | --              |                    |          |       |          |          |       |             |
| Heavy Drinking Years | 0.002      | 0.34***     | 0.01       | 0.09         | 0.30***       | 0.29***         | -0.21*          | --                 |          |       |          |          |       |             |
| Neuroticism          | 0.17       | 0.05        | -0.18*     | 0.13         | 0.13          | 0.13            | 0.04            | -0.04              | --       |       |          |          |       |             |
| Extraversion         | -0.15      | 0.03        | 0.08       | -0.27**      | -0.04         | -0.18*          | -0.04           | 0.001              | -0.10    | --    |          |          |       |             |
| Openness             | -0.05      | -0.21*      | 0.02       | 0.06         | -0.02         | -0.06           | 0.02            | -0.25**            | -0.07    | 0.002 | --       |          |       |             |
| Agreeableness        | -0.14      | -0.10       | 0.08       | -0.14        | -0.19*        | -0.20*          | 0.23**          | -0.20*             | -0.17    | -0.06 | 0.22*    | --       |       |             |
| Conscientiousness    | -0.16      | -0.16       | -0.10      | -0.17*       | -0.10         | -0.19*          | 0.08            | -0.14              | -0.30*** | 0.10  | 0.02     | 0.15     | --    |             |
| AUDIT Score          | 0.05       | 0.23**      | -0.01      | 0.09         | 0.27**        | 0.21*           | -0.24**         | 0.52***            | 0.13     | 0.15  | -0.29*** | -0.28*** | -0.15 | --          |

**Supplemental Table 3.** Continued

Notes: N = Neuroticism, E = Extraversion, O = Openness, A = Agreeableness, C = Conscientiousness

\*p < 0.05

\*\* p < 0.01

\*\*\* p < 0.001

**Supplemental Table 4.** Results of multiple mediation analyses for total CTQ score for the CON subjects<sup>1</sup>

| Independent Variable (IV) | Mediator             | Effect of IV on Mediator | Effect of Mediator on AUDIT Score | Indirect Effect Estimate <sup>2</sup> | 95% Bias-Corrected Confidence Interval | Total Effect of IV | Direct Effect of IV |
|---------------------------|----------------------|--------------------------|-----------------------------------|---------------------------------------|----------------------------------------|--------------------|---------------------|
| CTQ Total Score           | Age of First Drink   | -0.04                    | -0.24*                            | 0.01                                  | -0.01, 0.10                            | -0.02              | -0.03               |
|                           | Heavy Drinking Years | -0.01                    | 0.24**                            | -0.0031                               | -0.05, 0.03                            |                    |                     |
|                           | Openness             | 0.07                     | -0.04                             | -0.003                                | -0.04, 0.01                            |                    |                     |
|                           | Agreeableness        | -0.21                    | -0.04                             | 0.01                                  | -0.02, 0.05                            |                    |                     |

<sup>1</sup> Effect estimates are unstandardized regression coefficients

<sup>2</sup> Based on 5000 bootstrapped samples

\*  $p < 0.05$

\*\*  $p < 0.01$
